# Supplementary material for: Weight-Control Behaviors and Dietary Intake in Chinese Adults: An Analysis of Three National Surveys (2002–2015)
Source: MDPI journal article supplement (doi:10.3390/nu15061395), 2023-03-14
Supplement: s1 [file s1]

## Supplementary material

### Weight-control behaviors and dietary intake in Chinese adults: an analysis of three national surveys (2002–2015)

Miyang Luo <sup>1</sup>, Yixu Liu <sup>1</sup>, Ping Ye <sup>2</sup>, Shuya Cai <sup>3</sup>, Zhenzhen Yao <sup>1</sup>, Liyun Zhao <sup>3</sup>, Jiayou Luo <sup>1,\*</sup> and Dongmei Yu <sup>3,\*</sup>

<sup>1</sup> Xiangya School of Public Health, Central South University, Changsha 410008, China; miyangluo@csu.edu.cn (M.L.); yixu.liu@csu.edu.cn (Y.L.); y13317437129@163.com (Z.Y.)

<sup>2</sup> Yuxi Center for Disease Control and Prevention, Yuxi 653100, China; yep20227890@163.com (P.Y.)

<sup>3</sup> Key Laboratory of Trace Element Nutrition of National Health Commission, National Institute for Nutrition and Health, Chinese Center for Disease Control and Prevention, Beijing 100050, China; caisy@ninh.chinacdc.cn (S.C.); zhaoly@ninh.chinacdc.cn (L.Z.)

\*Correspondence: jiayouluo@126.com (J.L.); yudm@ninh.chinacdc.cn (D.Y.)

#### Contents

**Table S1.** CHDI components and criteria for scoring.

**Table S2.** Characteristics of adults across the three rounds of China National Nutrition Surveys.

**Table S3.** Univariate analysis of the effect of weight control behavior on diet quality among Chinese adult residents.

**Table S4.** Logistic regression analysis of the influence of weight control behavior on diet quality among Chinese adult residents.

**Table S1.** CHDI components and criteria for scoring [1].

| CHDI Component                   | Score Range | Standard for Maximum Score | Standard for Minimum Score of Zero |
|----------------------------------|-------------|----------------------------|------------------------------------|
| Food variety                     | 0-10        | ≥12 kind                   | ≤5 kind                            |
| Refined grains                   | 0-5         | ≥100g/1000kcal             | 0                                  |
| Whole grain, dry bean, and tuber | 0-5         | ≥40g/1000kcal              | 0                                  |
| Total vegetables                 | 0-5         | ≥180g/1000kcal             | 0                                  |
| Dark green and orange vegetables | 0-5         | ≥90g/1000kcal              | 0                                  |
| Fruit                            | 0-10        | ≥110g/1000kcal             | 0                                  |
| Dairy                            | 0-10        | ≥100g/1000kcal             | 0                                  |
| Soybean                          | 0-10        | ≥10g/1000kcal              | 0                                  |
| Meat and egg                     | 0-5         | ≥50g/1000kcal              | 0                                  |
| Fish, shellfish and mollusk      | 0-5         | ≥30g/1000kcal              | 0                                  |
| Calories from SFAs               | 0-10        | < 10%                      | ≥15%                               |
| Sodium                           | 0-10        | ≤1g/1000kcal               | ≥4g/1000kcal                       |
| Empty calories                   | 0-10        | ≤20%                       | ≥40%                               |

Abbreviation: CHDI, China Healthy Diet Index; SFAs, saturated fatty acids.

**Table S2.** Characteristics of adults across the three rounds of China National Nutrition Surveys.

| Variable                             | 2002<br>( <i>n</i> =45,148) | 2012<br>( <i>n</i> =53,578) | 2015<br>( <i>n</i> =68,629) |
|--------------------------------------|-----------------------------|-----------------------------|-----------------------------|
| Gender                               |                             |                             |                             |
| Male                                 | 21,670 (50.6)               | 24,884 (50.9)               | 32,977 (50.6)               |
| Female                               | 23,478 (49.4)               | 28,694 (49.1)               | 35,652 (49.4)               |
| Age group (years)                    |                             |                             |                             |
| 18-39                                | 17,400 (43.5)               | 12,795 (43.8)               | 13,293 (42.4)               |
| 40-64                                | 22,303 (45.1)               | 30,489 (44.5)               | 41,259 (47.2)               |
| ≥65                                  | 5445 (11.4)                 | 10,294 (11.7)               | 14,077 (10.4)               |
| Education level                      |                             |                             |                             |
| Elementary school and below          | 18,998 (38.8)               | 22,180 (33.7)               | 34,019 (38.9)               |
| Secondary school                     | 23,039 (53.8)               | 26,864 (54.5)               | 29,827 (50.2)               |
| College and above                    | 3044 (7.4)                  | 4534 (11.8)                 | 4783 (10.9)                 |
| Occupation                           |                             |                             |                             |
| Employed                             | 30,325 (68.0)               | 34,616 (70.3)               | 49,681 (76.6)               |
| Unemployed                           | 14,749 (32.0)               | 18,958 (29.7)               | 18,948 (23.4)               |
| Annual income per capita             |                             |                             |                             |
| Low                                  | 32,462 (73.4)               | 26,230 (51.3)               | 26,066 (44.9)               |
| High                                 | 11,791 (26.6)               | 24,801 (48.7)               | 31,291 (55.1)               |
| Area                                 |                             |                             |                             |
| Urban                                | 15,053 (33.4)               | 26,561 (48.0)               | 27,340 (39.5)               |
| Rural                                | 30,095 (66.6)               | 27,017 (52.0)               | 41,289 (60.5)               |
| Body mass index (kg/m <sup>2</sup> ) |                             |                             |                             |
| <18.5                                | 2768 (7.3)                  | 2119 (5.6)                  | 2486 (4.7)                  |
| 18.5-23.9                            | 23,940 (58.1)               | 23,227 (52.6)               | 31,325 (49.2)               |
| 24-27.9                              | 11,318 (25.7)               | 15,308 (30.4)               | 23,421 (32.6)               |
| ≥28                                  | 3988 (8.9)                  | 5579 (11.4)                 | 9457 (13.5)                 |
| Weight control behavior              |                             |                             |                             |
| Yes                                  | 1981 (4.5)                  | 4758 (9.5)                  | 5167 (9.1)                  |
| No                                   | 43,167 (95.5)               | 48,820 (90.5)               | 63,462 (90.9)               |

Data are *n* (weighted%). Number missing: Occupation (*n*=78), Annual income per capita (*n*=14,714), Education level (*n*=67), Body mass index (*n*=12,419).

**Table S3.** Univariate analysis of the effect of weight control behavior on diet quality among Chinese adult residents.

| Variable                    | Diet quality: low | Diet quality: high | $\chi^2$  | <i>p</i> |
|-----------------------------|-------------------|--------------------|-----------|----------|
| Overall                     | 134,078 (80.0)    | 33,277(20.0)       |           |          |
| Gender                      |                   |                    | 28.171    | <0.001   |
| Male                        | 64,027 (50.9)     | 15,504 (49.2)      |           |          |
| Female                      | 70,051 (49.1)     | 17,773 (50.8)      |           |          |
| Age group (years)           |                   |                    | 107.212   | <0.001   |
| 18-39                       | 34,171 (42.6)     | 9317 (45.5)        |           |          |
| 40-64                       | 76,088 (46.4)     | 17,963 (43.3)      |           |          |
| ≥65                         | 23,819 (11.0)     | 5997 (11.2)        |           |          |
| Education level             |                   |                    | 7645.021  | <0.001   |
| Elementary school and below | 66,084 (41.1)     | 9113 (21.6)        |           |          |
| Secondary school            | 61,016 (51.4)     | 18,714 (57.2)      |           |          |
| College and above           | 6919 (7.5)        | 5442 (21.2)        |           |          |
| Occupation                  |                   |                    | 978.514   | <0.001   |
| Employed                    | 38,821 (26.0)     | 13,834 (34.7)      |           |          |
| Unemployed                  | 95,194 (74.0)     | 19,428 (65.3)      |           |          |
| Annual income per capita    |                   |                    | 4784.859  | <0.001   |
| Low                         | 79,370 (64.8)     | 13,049 (43.0)      |           |          |
| High                        | 42,581 (35.2)     | 17,641 (57.0)      |           |          |
| Area                        |                   |                    | 10752.582 | <0.001   |
| Urban                       | 46,678 (34.3)     | 22,276 (65.7)      |           |          |
| Rural                       | 87,400 (65.7)     | 11,001 (34.3)      |           |          |
| Nutrition level             |                   |                    | 67.366    | <0.001   |
| Non-overweight obesity      | 69,533 (58.9)     | 16,332 (56.2)      |           |          |
| Overweight obesity          | 54,290 (41.1)     | 14,781 (43.8)      |           |          |
| Weight control behavior     |                   |                    | 1519.822  | <0.001   |
| No                          | 126,245 (93.3)    | 29,204 (86.8)      |           |          |
| Yes                         | 7833 (6.7)        | 4073 (13.2)        |           |          |

Data are *n* (weighted%). Number missing: Occupation (*n*=78), Annual income per capita (*n*=14,714), Education level (*n*=67), Nutrition level (*n*=12,419). A China healthy diet index (CHDI) score of ≥60 indicates a high-quality diet, otherwise a low-quality diet. BMI <18.5 kg/m<sup>2</sup> and BMI 18.5-23.9 kg/m<sup>2</sup> were defined as the non-overweight obesity group, and BMI 24-27.9 kg/m<sup>2</sup> and BMI ≥28 kg/m<sup>2</sup> were defined as the overweight obesity group. The univariate analysis was conducted using the Chi-square test.

**Table S4.** Logistic regression analysis of the influence of weight control behavior on diet quality among Chinese adult residents.

| Variable                    | $\beta$ | S.E.  | Wald     | <i>p</i> -Value | OR (95% CI)         |
|-----------------------------|---------|-------|----------|-----------------|---------------------|
| Gender                      |         |       |          |                 |                     |
| Male                        |         |       |          |                 | ref                 |
| Female                      | -0.083  | 0.015 | 31.711   | <0.001          | 0.920 (0.894,0.947) |
| Age group (years)           |         |       |          |                 |                     |
| 18-39                       |         |       |          |                 | ref                 |
| 40-64                       | -0.033  | 0.016 | 4.114    | 0.043           | 0.968 (0.937,0.999) |
| ≥65                         | -0.138  | 0.027 | 26.123   | <0.001          | 0.871 (0.826,0.918) |
| Education level             |         |       |          |                 |                     |
| Elementary school and below |         |       |          |                 | ref                 |
| Secondary school            | -0.529  | 0.018 | 835.919  | <0.001          | 0.589 (0.568,0.611) |
| College and above           | -1.010  | 0.027 | 1444.971 | <0.001          | 0.364 (0.346,0.384) |
| Occupation                  |         |       |          |                 |                     |
| Employed                    |         |       |          |                 | ref                 |
| Unemployed                  | 0.241   | 0.017 | 210.160  | <0.001          | 1.273 (1.232,1.315) |
| Annual income per capita    |         |       |          |                 |                     |
| Low                         |         |       |          |                 | ref                 |
| High                        | -0.592  | 0.016 | 1456.899 | <0.001          | 0.553 (0.537,0.570) |
| Area                        |         |       |          |                 |                     |
| Urban                       |         |       |          |                 | ref                 |
| Rural                       | 0.849   | 0.016 | 2816.688 | <0.001          | 2.337 (2.265,2.412) |
| Nutrition level             |         |       |          |                 |                     |
| Non-overweight obesity      |         |       |          |                 | ref                 |
| Overweight obesity          | 0.077   | 0.015 | 26.635   | <0.001          | 1.080 (1.049,1.113) |
| Weight control behavior     |         |       |          |                 |                     |
| Yes                         |         |       |          |                 | ref                 |
| No                          | 0.262   | 0.024 | 123.552  | <0.001          | 1.30 (1.241,1.362)  |

A China healthy diet index (CHDI) score of ≥60 indicates a high-quality diet, otherwise a low-quality diet. BMI <18.5 kg/m<sup>2</sup> and BMI 18.5-23.9 kg/m<sup>2</sup> were defined as the non-overweight obesity group, and BMI 24-27.9 kg/m<sup>2</sup> and BMI ≥28 kg/m<sup>2</sup> were defined as the overweight obesity group.

#### References:

1. He, Y.; Fang, Y.; Yang, X. Establishment and application of China healthy diet index. *Acta Nutrimenta Sinica* **2017**, *39*, 436-441. <https://doi:10.13325/j.cnki.acta.nutr.sin.2017.05.011>.
